# Supplementary material for: Astroglial exosome HepaCAM signaling and ApoE antagonization coordinates early postnatal cortical pyramidal neuronal axon growth and dendritic spine formation
Source: PubMed Central journal article supplement — bioRxiv. 2023 Feb 14:2023.02.14.528554. Preprint. [Version 1] doi: 10.1101/2023.02.14.528554 (PMC9948960; doi:10.1101/2023.02.14.528554), 2023-02-14
Supplement: NIHPP2023.02.14.528554v1-supplement-4.pdf [file NIHPP2023.02.14.528554v1-supplement-4.pdf]

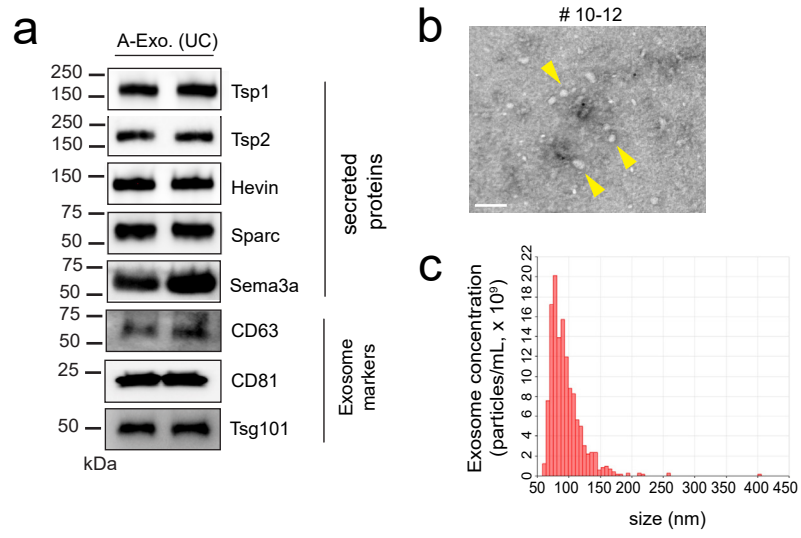

Supplementary figure 1

24 **Supplementary Fig. 1 a**, Representative immunoblots of astroglia secreted proteins and  
25 exosome markers in A-Exo. isolated from ACM (20 mL/sample) by ultracentrifugation (UC).  
26 **b**, Representative immunoEM images of CD63 labeling in SEC eluted fractions #10-12;  
27 yellow arrows: CD63<sup>-</sup> small vesicles; scale bar: 100 nm. **c**, Representative size distribution  
28 analysis of WT A-Exo measured by the qNano particle analyzer.

29

30

31

32

33

34

35

36

37

38

39

40

41

42

43

44

45

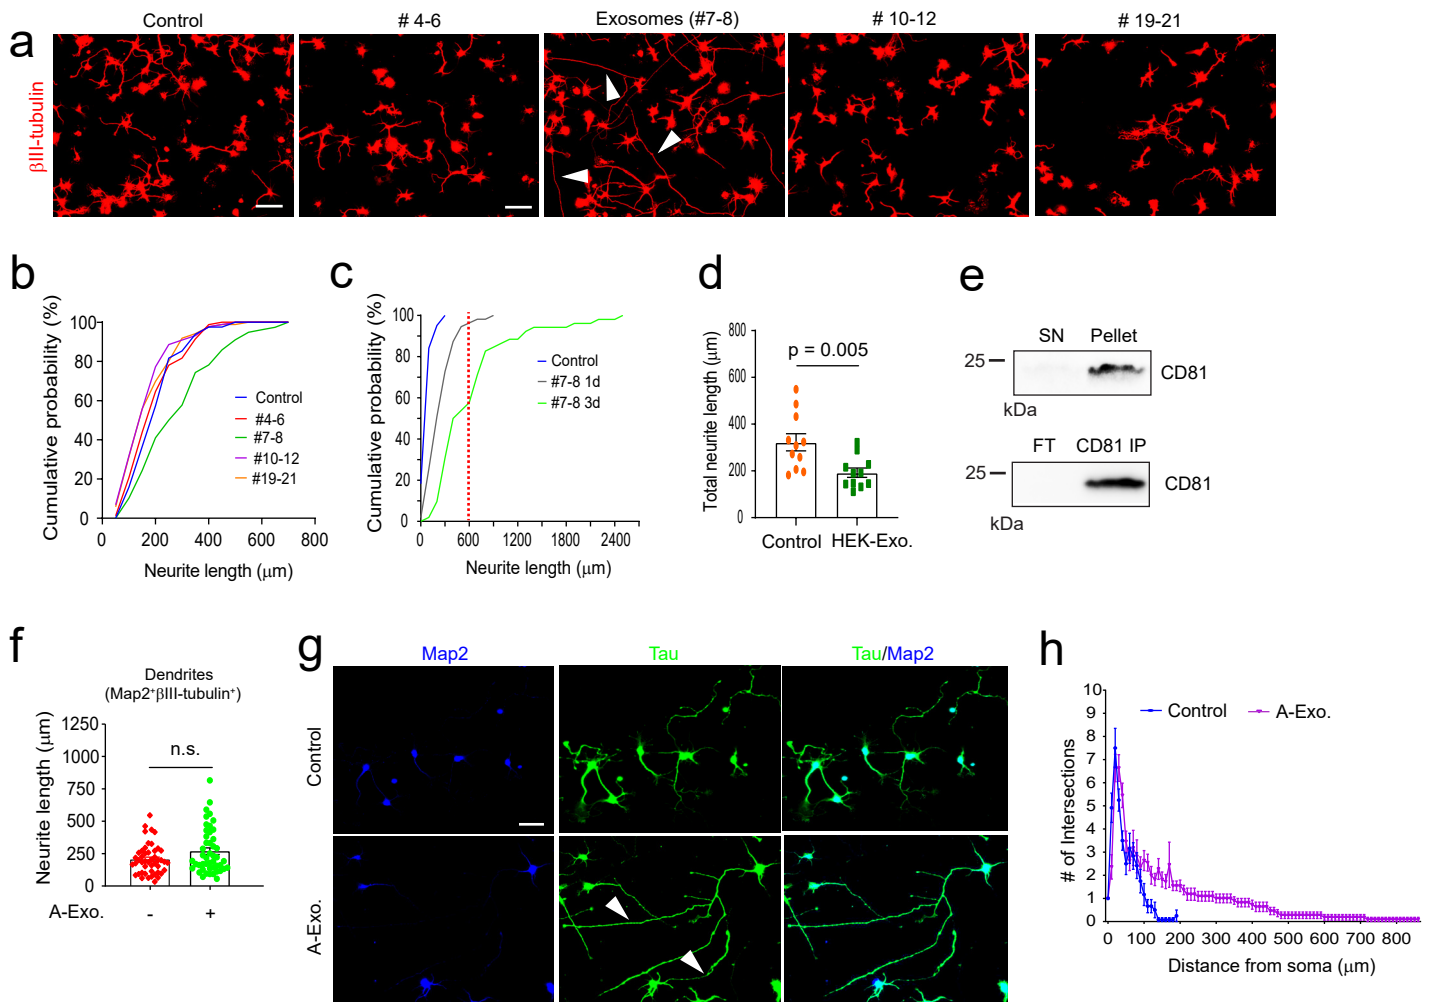

Supplementary figure 2

46 **Supplementary Fig. 2 a**, Representative images of  $\beta$ III-tubulin<sup>+</sup> cortical neurons following  
47 treatment with eluted fractions (pooled as indicated) #4-6, #7-8, #10-12, or #19-21 from  
48 the SEC. Scale bar: 100  $\mu$ m; **b**, Quantification of total neurite length of cortical neurons  
49 following treatment with eluted fractions (pooled as indicated, 100  $\mu$ l). #4-6 (no protein  
50 detected), #10-12, and #19-21 (1 $\mu$ g/ $\mu$ l) from the SEC of ACM (initial 100 mL). 1 $\mu$ g exosomes  
51 (#7-8) were used in treatment, n = 78-88 neurons (> 3 biological replicates)/group; **c**,  
52 Quantification of total neurite length of cortical neurons following treatment with fractions  
53 #7-8 (5 $\mu$ l, 0.2  $\mu$ g/ $\mu$ l) for 1 or 3 d. n = 52-82 neurons (> 3 biological replicates)/group; **d**,  
54 Quantification of total neurite length of cortical neurons following treatment with HEK  
55 exosomes isolated by SEC. n = 11-13 neurons (2 biological replicates)/group; **e**,  
56 Representative immunoblot of CD81 in the supernatant (SN) or pellet of SEC fractions #7-8  
57 (1 mL, from initial 10 mL ACM) following an additional 24 h ultracentrifugation (UC, 100,000  
58 x g), or in the flowthrough (FT) or CD81 immunoprecipitation (IP) pellet of SEC fractions #7-  
59 8 after CD81 pull-down. **f**, Quantification of dendrite (Map2<sup>+</sup> $\beta$ III-tubulin<sup>+</sup>) length of cortical  
60 neurons following A-Exo. treatment. n = 51-55 neurons (> 3 biological replicates)/group; **g**,  
61 Representative images of Map2 and Tau staining on cortical neurons following A-Exo  
62 treatment. Scale bar: 50  $\mu$ m; **h**, Sholl analysis of cortical neurons following A-Exo treatment.  
63 n = 10 neurons (2 biological replicates)/group; 1  $\mu$ g exosome was used in **b-c**, **f**, and **h**. p  
64 values in **d** and **f** determined from two-tailed t test.

65

66

67



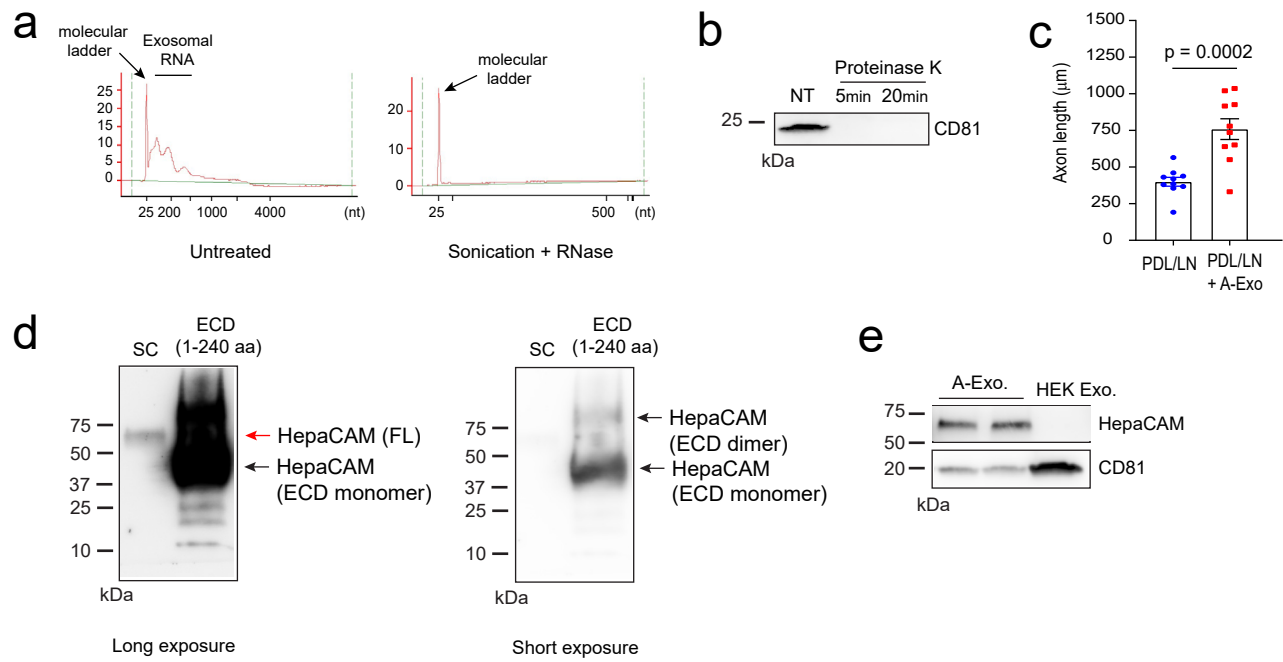

Supplementary figure 3

68 **Supplementary Fig. 3 a**, Representative bioanalyzer tracer of exosomal RNA with and  
69 without RNase treatment (5 minutes) following sonication. Sufficient small RNA was  
70 observed in untreated A-Exo. **b**, Representative immunoblot of CD81 following proteinase K  
71 treatment. 0.5  $\mu$ g A-Exo. was treated with proteinase K for either 5 or 20 minutes. NT: not  
72 treated A-Exo; CD81 immunoreactivity disappeared from the immunoblot as a result of the  
73 proteinase K digestion; **c**, Quantification of axon length of cortical neurons plated on either  
74 PDL/laminin (LN) coated or PDL/LN/A-Exo. coated coverslips. n = 10 neurons (2 biological  
75 replicates)/group; 1 $\mu$ g A-Exo. was used in each treatment. p value in **c** determined from two-  
76 tailed t test; **d**, Representative HepaCAM immunoblot with spinal cord (sc) lysate (20  $\mu$ g) and  
77 recombinant human HepaCAM extracellular domain (ECD) protein (1-240 aa, 1  $\mu$ g). HepaCAM  
78 antibody (Proteintech) is able to detect mouse HepaCAM full-length (sc lane) and human  
79 ECD (monomer and dimer). **e**, Representative HepaCAM immunoblot in A-Exo. and HEK  
80 exosomes.

81

82

83

84

85

86

87

88

89

90

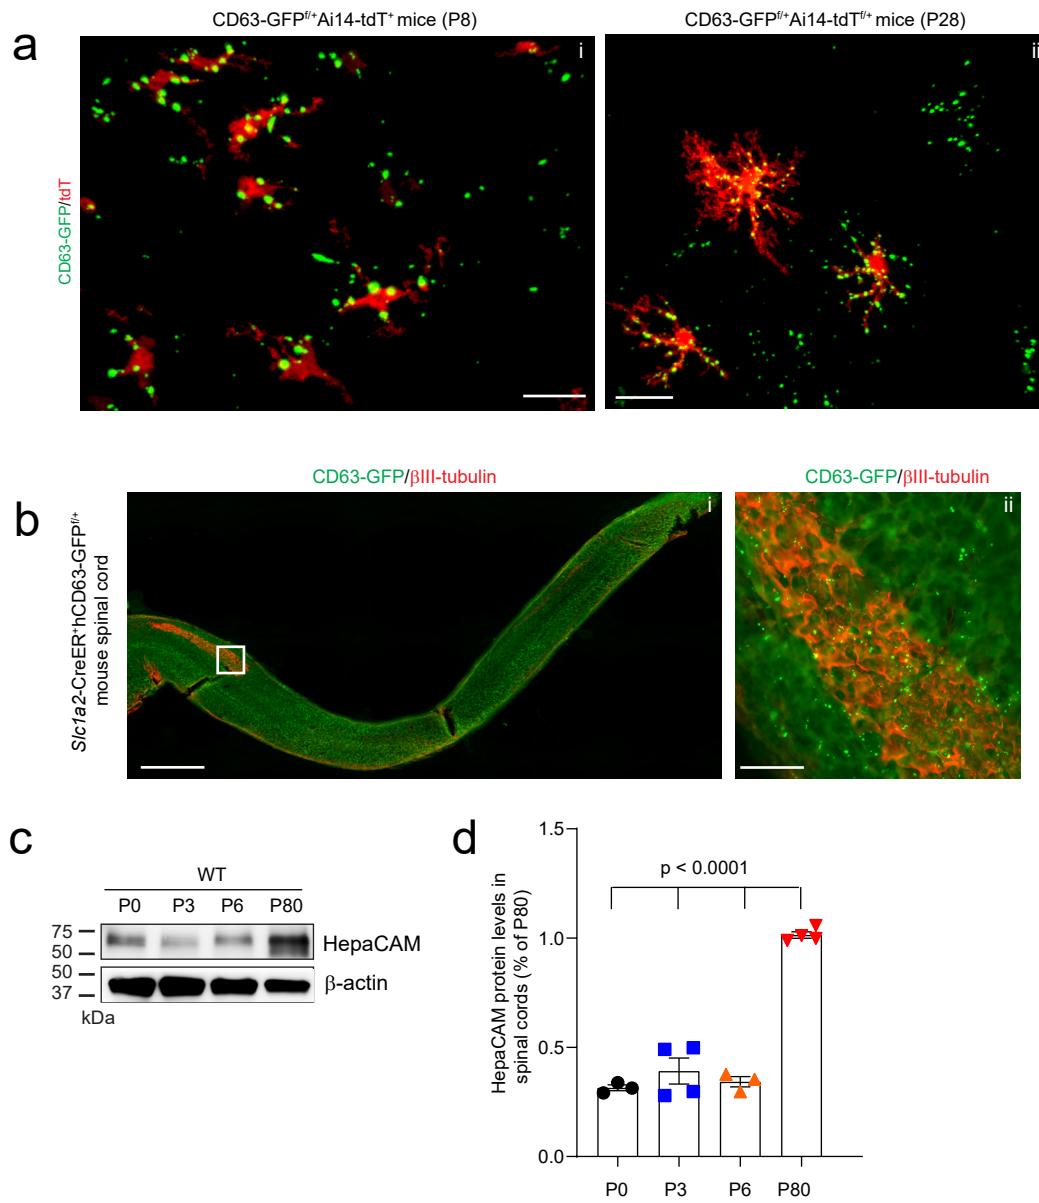

Supplementary figure 4

91 **Supplementary Fig. 4 a**, Representative images of tdT<sup>+</sup> astroglia and astroglia-derived  
92 CD63-GFP<sup>+</sup> puncta from the motor cortex of AAV5-mCherry-*Gfap*-Cre-injected CD63-  
93 GFP<sup>f/+</sup>Ai14-tdT<sup>f/+</sup> mice at P8 (i) and P28 (ii). Scale bar: 20  $\mu$ m; **b**, Representative longitudinal  
94 image of  $\beta$ III-tubulin staining and astroglia-derived CD63-GFP<sup>+</sup> puncta along the spinal cord  
95 from 4-OHT-injected *Slc1a3*-CreER<sup>+</sup> mice at P8. Subpanel i: the longitudinal image of the  
96 spinal cord; Subpanel ii: a magnified view of the box in the subpanel i; Scale bar: 1mm  
97 (subpanel i); 100  $\mu$ m (subpanel ii); Representative HepaCAM immunoblot (**c**) and  
98 quantification (**d**) of HepaCAM expression in spinal cords during postnatal development. n =  
99 3-4 mice/time point; p values determined by one-way ANOVA followed by post-hoc Tukey's  
100 test.

101

102

103

104

105

106

107

108

109

110

111

112

113

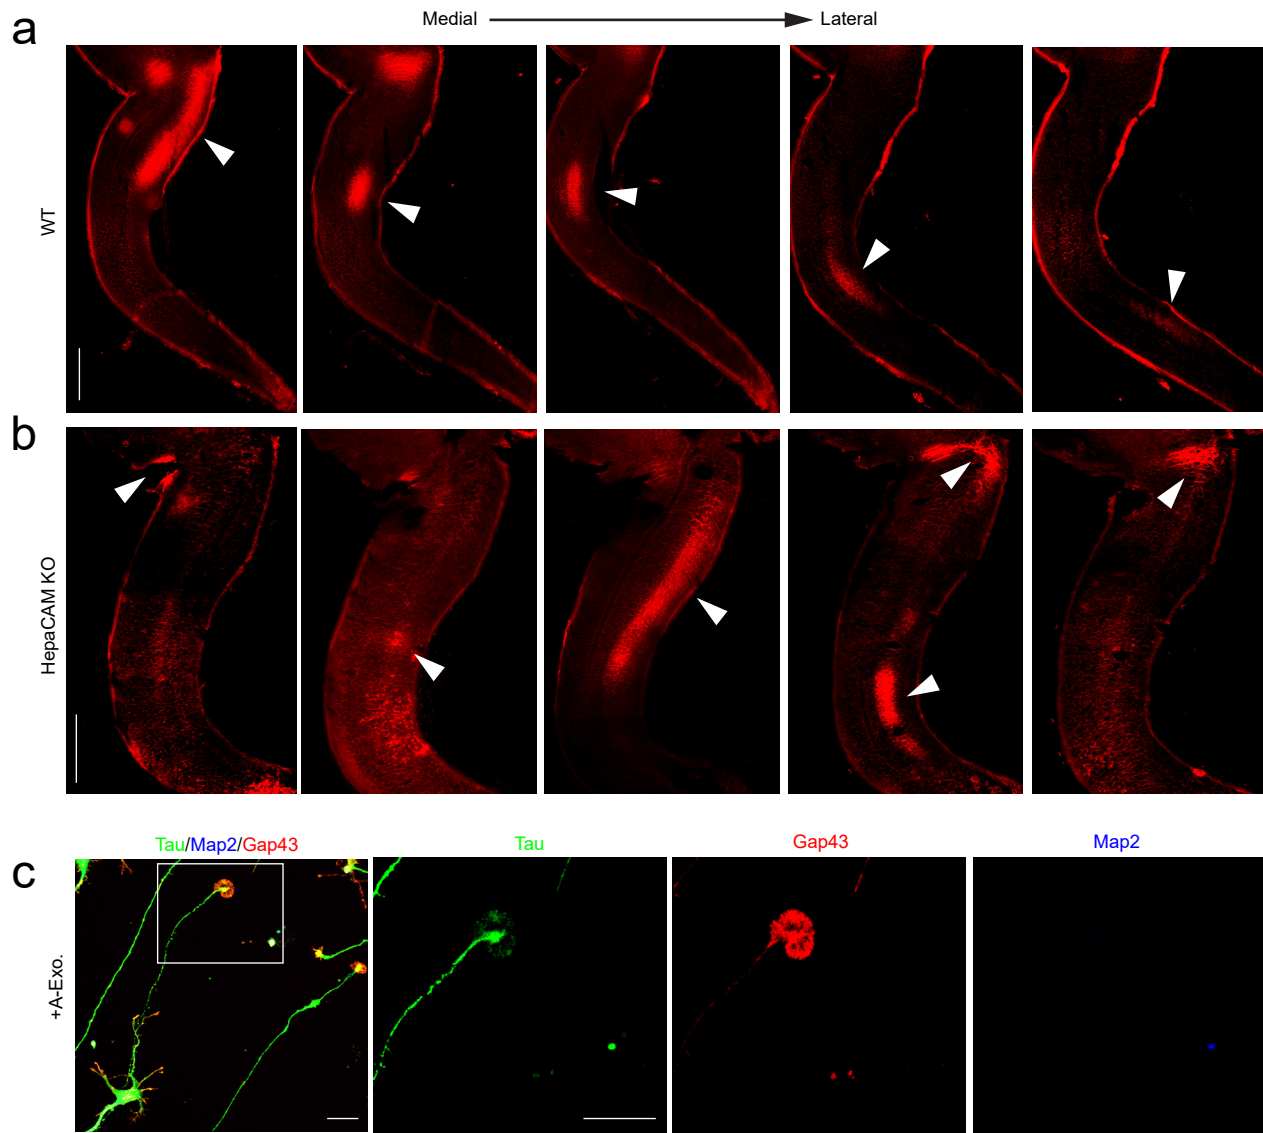

Supplementary figure 5

114 **Supplementary Fig. 5** Representative original set of longitudinal images from CM-DiI-  
115 injected WT **(a)** and HepaCAM KO **(b)** mouse spinal cords that were superimposed into the  
116 continuous CST axon growth image shown in Fig. 5C. Images of longitudinal spinal cord  
117 sections were taken from lateral to medial orientation at P3. White arrows: CM-DiI labeling;  
118 Scale bar: 1mm; **c**, Representative image of Tau, Map2, and Gap43 immunostaining of A-Exo-  
119 treated cultured cortical neurons to illustrate axonal growth cones and axons; Scale bar: 20  
120  $\mu\text{m}$ .

121

122

123

124

125

126

127

128

129

130

131

132

133

134

135

136

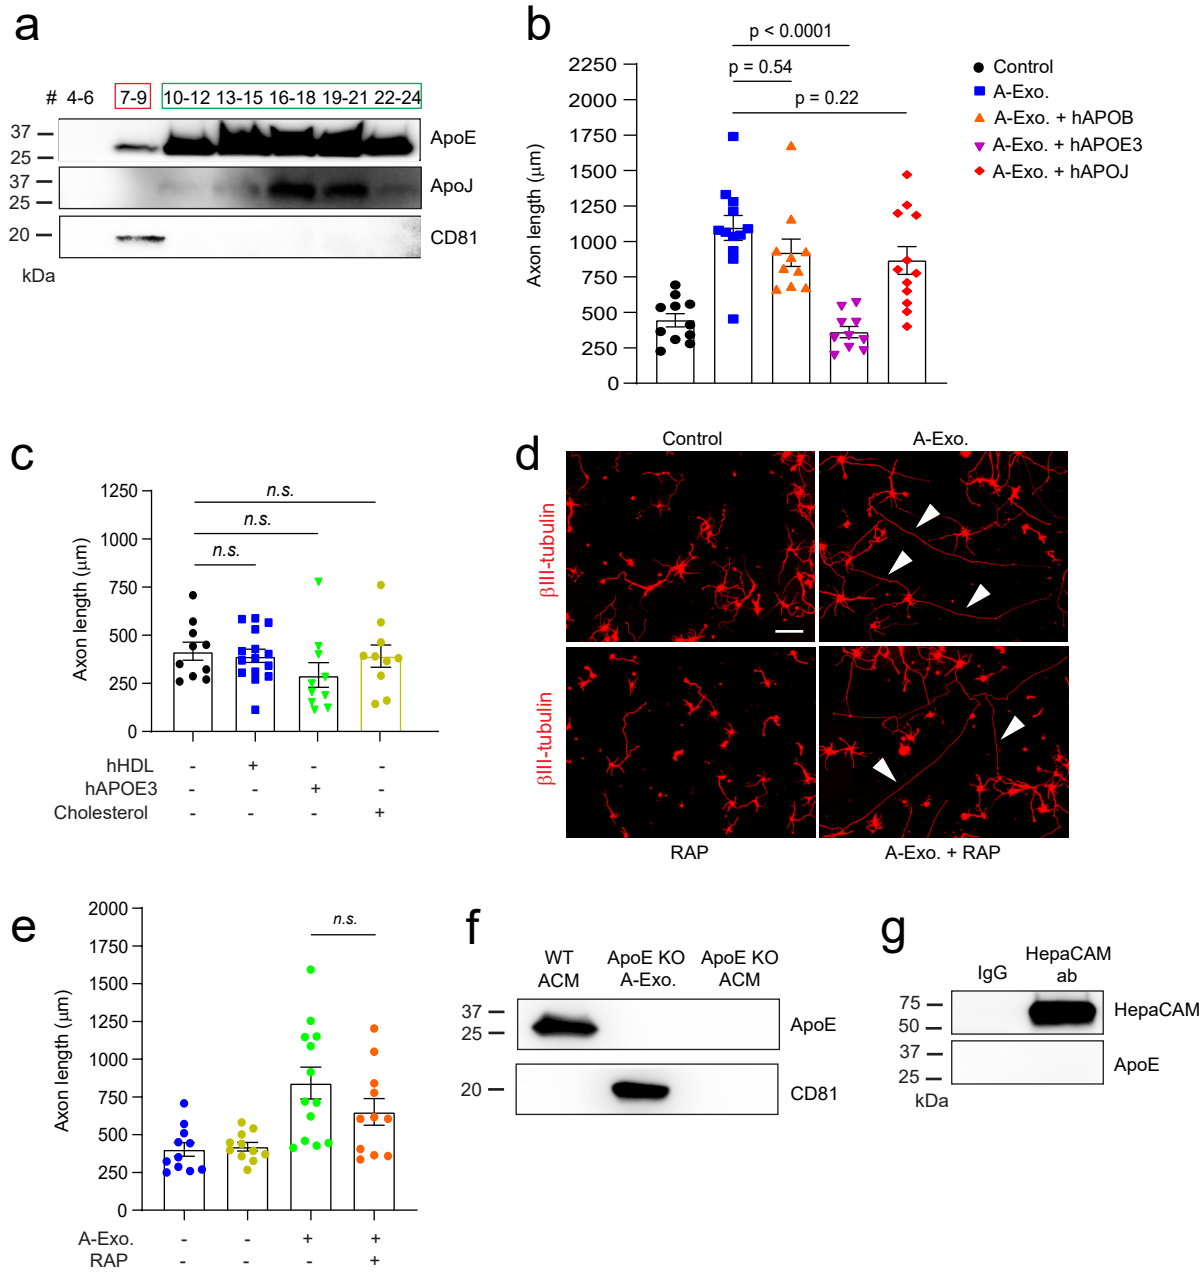

Supplementary figure 6

137 **Supplementary Fig. 6 a**, Representative immunoblot of ApoE and ApoJ in all eluted fractions  
138 (500  $\mu$ l/fraction, pooled as indicated) of ACM (100 mL) from SEC with oversaturated  
139 exposure. 15  $\mu$ l unconcentrated elution was run on immunoblot. **b**, Quantification of  $\beta$ III-  
140 tubulin<sup>+</sup> neuronal axon length following co-treatment of A-Exo. with hAPOEB, hAPOEJ, or  
141 hAPOE3, respectively. 1 $\mu$ g A-Exo. was used in treatment. hAPOEB, hAPOEJ, or hAPOE3 each  
142 was at 10  $\mu$ g/mL dose. n = 11-12 neurons (2 biological replicates)/group; **c**, Quantification  
143 of  $\beta$ III-tubulin<sup>+</sup> neuronal axon length following treatment of hHDL (10  $\mu$ g/mL), hApoE3 (20  
144  $\mu$ g/mL), and cholesterol (1  $\mu$ g/mL), respectively. n = 10-15 neurons (2 biological  
145 replicates)/group; Representative images (**d**) and quantification (**e**) of  $\beta$ III-tubulin<sup>+</sup>  
146 neuronal axon (white arrows) length following co-treatment of A-Exo. and ApoE competitive  
147 receptor associated protein (RAP, 50  $\mu$ g/mL). Scale bar: 100  $\mu$ m; **f**, Representative ApoE  
148 immunoblot from WT or ApoE ACM (50 $\mu$ g proteins), and ApoE A-Exo (2  $\mu$ g proteins). **g**,  
149 Detection of HepaCAM but not Apoe following HepaCAM immunoprecipitation from  
150 astrocyte lysates (50  $\mu$ g proteins). 1 $\mu$ g A-Exo. was used in **b**, **d**, **e**, and **f**. p values in **b**, **c**, and  
151 **e** determined from one-way ANOVA followed by a Tukey post-hoc test.

152

153

154

155

156

157

158

159



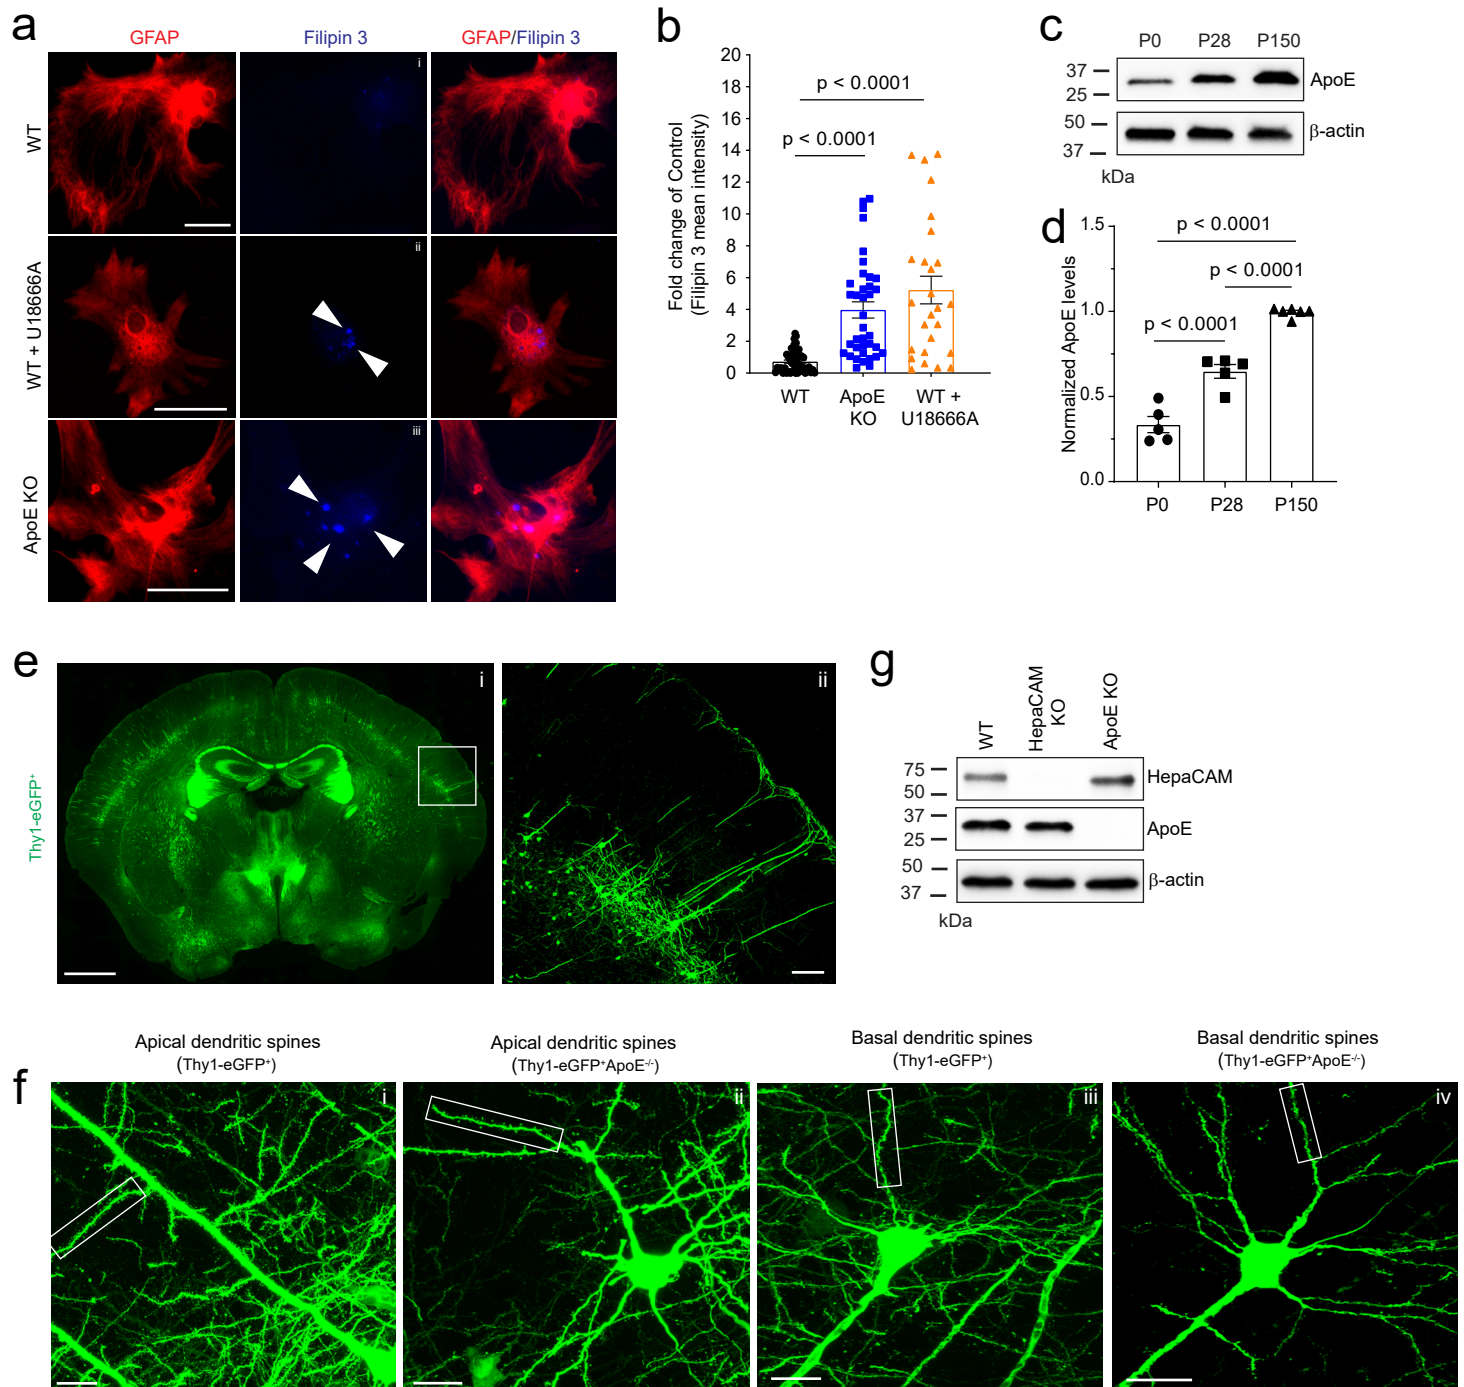

Supplementary figure 7

160 **Supplementary Fig. 7** Representative images **(a)** of cultured astrocytes and cholesterol  
161 labeling and quantification **(b)** of cholesterol in astrocytes based on Filipin 3 fluorescent  
162 intensity. Scale bar: 50  $\mu\text{m}$ ; White arrows: Filipin 3<sup>+</sup> cholesterol labeling; n = 26-35  
163 astrocytes (3 biological replicates)/group; Representative images **(c)** of ApoE immunoblot  
164 and quantification **(d)** of ApoE expression in the cortex during postnatal development; n =  
165 5-6 mice/group; **e**, eGFP labeling of neurons and neurites in Thy1-eGFP<sup>+</sup> mice. Subpanel i:  
166 Representative image of coronal section of the Thy1-eGFP<sup>+</sup> mouse brain (scale bar: 1mm);  
167 ii: a magnified view of the motor cortex (white box) in the subpanel i (scale bar: 100  $\mu\text{m}$ ); **f**,  
168 Representative images of eGFP<sup>+</sup> neurons and their dendritic spines. Subpanel i: apical  
169 dendritic spines from Thy1-eGFP<sup>+</sup> mice; ii: apical dendritic spines from Thy1-eGFP<sup>+</sup>ApoE<sup>-/-</sup>  
170 mice; iii: basal dendritic spines from Thy1-eGFP<sup>+</sup> mice; iv: basal dendritic spines from Thy1-  
171 eGFP<sup>+</sup>ApoE<sup>-/-</sup> mice; Scale bars: 20  $\mu\text{m}$ ; a magnified view of the highlighted box is shown in  
172 Fig. 7d-e; **g**, Representative HepaCAM and ApoE immunoblots from cortex of ApoE KO and  
173 HepaCAM KO mice at P30.

174

175

176

177

178

179

180

181

182

183 **Supplementary Table 1.** Transmembrane proteins identified from A-Exo. by LC/MS/MS.

184 Each identified protein has at least 3 peptide hits with 95% confidence threshold; The mean

185 iBAQ value is greater than  $1 \times 10^5$ .

186

187 **Supplementary Movies** Live imaging of control and A-Exo (1 $\mu$ g). -induced axon growth in

188 primary cortical neuronal cultures.
